# Supplementary material for: Ecological Drivers of Cogon Grass (Imperata Cylindrica) Invasion: A Global Assessment of Range Expansion under Wildfire and Climate Change
Source: Research Square preprint supplement (doi:10.21203/rs.3.rs-8255500/v1), 2025-12-29
Supplement: Supplementary file 1 [file c26f2cf235445556714381c7.xlsx]

## Sheet: Table S1
Table S1. List of environmental variables used in modeling of cogon grass
Code	Description	Unit
Bio01	Annual mean temperature	Degrees Celsius
Bio02	Mean diurnal temperature range	Degrees Celsius
Bio03	Isothermality (BIO2/BIO7) (* 100)	Dimensionless
Bio04	Temperature seasonality	Degrees Celsius
Bio05	Max temperature of warmest month	Degrees Celsius
Bio06	Min temperature of coldest month	Degrees Celsius
Bio07	Temperature annual range	Degrees Celsius
Bio08	Mean temperature of wettest quarter	Degrees Celsius
Bio09	Mean temperature of driest quarter	Degrees Celsius
Bio10	Mean temperature of warmest quarter	Degrees Celsius
Bio11	Mean temperature of coldest quarter	Degrees Celsius
Bio12	Annual precipitation	Millimeters
Bio13	Precipitation of wettest month	Millimeters
Bio14	Precipitation of driest month	Millimeters
Bio15	Precipitation seasonality	Fraction
Bio16	Precipitation of wettest quarter	Millimeters
Bio17	Precipitation of driest quarter	Millimeters
Bio18	Precipitation of warmest quarter	Millimeters
Bio19	Precipitation of coldest quarter	Millimeters
Wild fire	Wild fire
HII	Human influene index
Land cover	Land use and land cover change
Soil carbon	Soil carbon
Soil moisture	Soil moisture
Soil pH	Soil pH

## Sheet: Table S2
Table S2. Pearson's correlation between environmental variables
	Bio1	Bio2	Bio3	Bio4	Bio5	Bio6	Bio7	Bio8	Bio9	Bio10	Bio11	Bio12	Bio13	Bio14	Bio15	Bio16	Bio17	Bio18	Bio19	HII	SC	SM	SpH	LULU	Wild fire
Bio1
Bio2	0.585848
Bio3	0.697315	0.46887
Bio4	-0.534035	-0.162549	-0.85168
Bio5	0.969307	0.651809	0.5545	-0.319021
Bio6	0.975287	0.494906	0.792801	-0.698751	0.894561
Bio7	-0.361708	0.11398	-0.728291	0.957579	-0.12542	-0.555613
Bio8	0.939324	0.543523	0.514455	-0.286559	0.963691	0.862262	-0.12127
Bio9	0.894149	0.516575	0.776723	-0.727351	0.804495	0.93666	-0.582561	0.709349
Bio10	0.977866	0.607699	0.563865	-0.346194	0.997283	0.910552	-0.165971	0.970128	0.814764
Bio11	0.98088	0.540149	0.794964	-0.687206	0.905976	0.997993	-0.529923	0.870423	0.936132	0.919319
Bio12	0.533334	0.0184463	0.644192	-0.562945	0.425517	0.603718	-0.54852	0.463033	0.509237	0.452979	0.585789
Bio13	0.537056	0.100256	0.644776	-0.575391	0.431508	0.601092	-0.531544	0.458645	0.514528	0.453967	0.59252	0.612351
Bio14	0.305513	-0.10064	0.340807	-0.274767	0.248776	0.34768	-0.308968	0.285536	0.270197	0.271473	0.324203	0.535647	0.460957
Bio15	-0.392155	0.047599	-0.0395577	0.0156816	-0.412336	-0.355406	0.0218519	-0.469876	-0.277996	-0.431307	-0.336166	-0.315492	-0.0907234	-0.471116
Bio16	0.556913	0.100851	0.652556	-0.575653	0.452977	0.618826	-0.530972	0.482485	0.526442	0.475901	0.609451	0.935801	0.992982	0.495803	-0.141272
Bio17	0.320043	-0.106356	0.368089	-0.306065	0.255427	0.36811	-0.341945	0.294154	0.291916	0.279749	0.343512	0.7688	0.494942	0.992459	-0.483067	0.529861
Bio18	0.51366	0.088576	0.476053	-0.356781	0.453221	0.526616	-0.325835	0.530242	0.374025	0.47833	0.519137	0.832176	0.778431	0.619372	-0.301984	0.798585	0.638327
Bio19	0.299881	-0.0897599	0.471253	-0.421108	0.21002	0.379517	-0.451734	0.213072	0.360112	0.231155	0.354595	0.760125	0.597576	0.670068	-0.290105	0.622063	0.699631	0.413193
HII	0.177027	0.0507584	0.197813	-0.279549	0.124584	0.226208	-0.270362	0.0741599	0.252555	0.128028	0.216567	0.203936	0.247624	0.0861941	0.0368413	0.234993	0.0957419	0.182167	0.108492
SC	-0.220274	-0.386524	-0.274009	0.281475	-0.184308	-0.240759	0.191558	-0.0772249	-0.342197	-0.175328	-0.255339	0.116263	0.0317288	0.214304	-0.209384	0.0454801	0.208979	0.139971	0.118312	-0.112845
SM	-0.0814517	-0.381297	0.059216	-0.173569	-0.162138	-0.0133076	-0.272081	-0.0938932	-0.0704703	-0.135069	-0.0352094	0.5489	0.406563	0.541107	-0.253936	0.427322	0.556845	0.498551	0.442311	0.1257	0.273174
SpH	0.0999461	0.371444	-0.0228709	0.0234552	0.135741	0.0677245	0.102185	0.0224112	0.177095	0.117736	0.0832977	-0.426534	-0.350521	-0.329004	0.149236	-0.370226	-0.341748	-0.381862	-0.310976	0.084926	-0.562742	-0.522469
LULC	0.12	0.27	0.16	0.04	0.15	0.21	0.13	0.11	0.16	0.23	0.07	0.16	0.18	0.31	0.33	0.25	0.01	0.001	0.24	0.26	0.18	0.24	0.02
Wild fire	0.16666	0.132863	0.132039	-0.0643169		0.15154	-0.0190825	0.167442	0.139518	0.169447	0.153944	0.0922236	0.115292	-0.00414277	7.55427e-05	0.116287	-0.0012722	0.0774366	0.0688997	0.00393263	0.0543534	0.0508739	-0.0175517	0.21
HII	Human influence index
SC	Soil carbon
SM	Soil moisture
Sph	Soil ph

## Sheet: Table S3
Table S3. Estimating the cell number in potential suitable habitats predicted using environmental variables with wildfire and without wildfire under the current climate (1979-2013)
Name of continent	Total cell count	Prediction with wild fire	Prediction without wildfire	Changed in suitability	overlapping area with or without wildfire	Overlapping (%)ª	Withwildfire only	Without wildfire only
North America	2127368	155259	139761	11.0889	136334	6.40858	18925	3427
Asia	3051281	391473	349222	12.0986	338916	11.1073	52557	10306
Europe	879830	73148	67725	8.00738	63567	7.22492	9581	4158
Africa	1473170	257874	155762	65.5564	151476	10.2823	106398	4286
Oceania	19600	10929	9783	11.7142	9778	49.8878	1151	5
South America	883195	215358	168176	28.0551	165175	18.702	50183	3001
Australia	399662	111054	96505	15.0759	94882	23.7406	16172	1623
Antarctica	3444160	0	0	0	0	0	0	0
ª, indicates the proportion of overallping of suitable habtiats predicted using environmental variables with wildfire and without wildfire

## Sheet: Table S4
Table S4. Estimating the mean habtiat suitability of I. cylindrica in different countries of the world using environmental variables with wildfire.
Name of country	Area (km²)	Mean habtiat estimation (%)
		Current	SSP1-2.6	SSP2-4.5	SSP3-7.0	SSP5-8.5
Afghanistan	775075	1.88627	2.9681	3.80028	3.76976	3.71706
Albania	38012	55.4299	58.9367	62.0475	61.6516	65.8371
Algeria	2.64396e+06	3.68693	4.34072	3.42915	3.69343	3.23887
Andorra	688	0	0	0	0	0
Angola	1.28404e+06	24.0008	42.8528	51.0339	57.0032	65.2863
Antarctica	74585736	0	0	0	0	0
Antigua and Barbuda	322.5	100	100	100	100	100
Argentina	3.44527e+06	44.9743	45.622	45.881	45.6226	45.8214
Armenia	38936.5	0	0	0.276091	0.552181	0.110436
Australia	8595872	28.6785	32.7027	34.6957	34.8405	29.581
Austria	124678	0	0	0	0	0
Azerbaijan	112359	15.4229	17.9679	18.9629	23.0195	13.031
Bahamas, The	10965	99.4118	99.4118	99.4118	99.4118	100
Bahrain	688	0	0	0	0	0
Bangladesh	148200	99.913	99.913	99.913	99.913	100
Barbados	451.5	100	100	100	100	100
Belgium	48482.5	0	0	0	0.133038	0.0886918
Belize	22725.5	59.9811	79.1864	91.2961	96.5941	84.2952
Benin	118508	86.103	95.3919	94.2852	88.6248	99.5463
Bhutan	44913.5	48.0613	48.0134	50.6941	51.0292	51.0771
Bolivia	1.14146e+06	37.3359	61.598	70.3038	70.5261	65.2992
Bosnia and Herzegovina	71724	12.2002	21.4329	31.1451	31.7746	39.2686
Botswana	627198	0.061703	0.106266	1.68998	1.09351	1.48773
Brazil	8.74553e+06	24.5943	34.1467	48.2121	41.3655	40.9206
Brunei	5762	66.791	83.5821	100	100	100
Bulgaria	150844	10.6613	41.7047	41.1773	39.7948	46.508
Burkina Faso	280424	58.7672	73.8864	79.0539	80.894	82.665
Burundi	27391	20.7221	70.7221	83.438	93.4851	95.9184
Byelarus	348838	0	0	0	0	0
Cambodia	187308	98.68	99.9656	99.9311	99.8737	94.5918
Cameroon	469517	28.6656	43.3373	55.4217	68.4632	84.0165
Canada	20824427	0	0.00103244	0.000619465	0.0060914	0.000516996
Cape Verde	989	13.0435	13.0435	36.9565	60.8696	54.3478
Central African Republic	626488	2.54298	19.6335	57.1262	83.2218	92.474
Chad	1328614	12.7031	15.8198	13.8973	18.8766	19.6032
Chile	909665	16.0742	14.8476	14.9965	16.7005	14.6946
China	11767810	24.8458	26.0114	25.913	27.011	26.6198
Colombia	1.14705e+06	13.9829	19.7972	24.8655	16.0878	18.8783
Comoros	1096.5	68.6275	86.2745	100	100	100
Congo	347074	15.8025	21.5326	23.7502	32.7696	62.095
Costa Rica	51944	10.8444	23.0132	29.8427	24.0066	16.0596
Croatia	75035	26.2464	46.9914	64.7851	62.9513	73.0372
Cuba	116487	80.6202	99.797	99.9446	99.9446	100
Cyprus	11201.5	90.595	96.929	94.8177	96.929	94.8177
Czech Republic	121668	0	0	0	0	0
Denmark	8166173	0	0	0	0	0
Djibouti	22252.5	0.57971	1.25604	3.47826	4.54106	5.32946
Dominica	795.5	94.5946	100	100	100	100
Dominican Republic	51320.5	18.0142	21.5333	38.4583	40.8044	34.4654
Ecuador	253141	0.900289	3.32937	14.6594	26.7284	31.9997
Egypt	1.12021e+06	0	0	0	0	0
El Salvador	21285	2.32323	2.22222	3.73737	2.0202	1.21212
Equatorial Guinea	26896.5	8.8729	26.4588	92.486	91.4468	99.5204
Eritrea	125517	4.86468	10.9113	17.1805	19.099	19.7362
Estonia	87053.5	0	0	0	0	0
Ethiopia	1147627	3.02746	10.2477	18.1891	19.1446	18.7137
Federated States of Micronesia	387	61.1111	72.2222	100	100	100
Fiji	18167.5	98.3432	99.8817	99.8817	99.8817	100
Finland	772710	0	0	0	0	0
France	899904	41.0742	40.1018	41.5807	44.8036	47.1419
Gabon	262515	31.3759	41.6462	56.6667	65.9132	90.8167
Gambia, The	11137	86.4865	77.7992	55.9846	61.7761	36.6795
Georgia	94191.5	28.7606	33.8279	35.1518	36.7724	35.2431
Germany	568589	0	0.0113439	0.0491568	0.0794071	0.1703
Ghana	242628	77.1821	97.2175	98.0151	99.8848	100
Greece	157488	75.1263	81.0648	83.0853	83.3038	72.2694
Grenada	387	77.7778	94.4444	94.4444	94.4444	100
Guatemala	114466	51.7656	65.1953	69.7784	69.121	47.8963
Guinea	250475	32.1545	39.8026	44.9185	47.5107	48.7983
Guinea-Bissau	33174.5	91.6397	96.8244	100	100	100
Guyana	213366	13.3011	37.9283	78.426	77.3478	82.1947
Haiti	27735	21.2403	26.124	48.9147	46.7442	49.4957
Honduras	116315	57.9667	70.5176	83.549	82.5139	63.3506
Hungary	136246	0.047341	1.8463	3.44011	3.20341	6.18589
Iceland	244434	0	0	0	0	0
India	3.45103e+06	66.6793	75.06	85.3133	86.1189	87.4403
Indonesia	1852139	16.7599	31.6602	69.2081	60.1897	64.9506
Iran	1933323	2.09292	2.89362	3.04152	2.93143	2.499
Iraq	521998	8.74006	9.18901	8.50941	8.57531	7.84217
Ireland	116680	31.6565	3.72213	0.0737055	7.64695	0.535549
Israel	24316.5	37.0469	37.5774	37.7542	38.1079	39.2573
Italy	408457	71.1864	72.955	74.9868	76.0606	75.0355
Ivory Coast	326908	45.2746	75.3436	84.4656	88.6945	93.101
Jamaica	11631.5	59.1497	59.1497	87.6155	93.1608	83.1793
Japan	458616	44.0908	44.6627	46.0457	47.9396	46.9292
Jordan	104791	3.016	3.20066	3.77513	3.50841	4.6984
Kazakhstan	4.08347e+06	0	0.0721322	0.135314	0.084242	0.104249
Kenya	586800	9.20383	16.4621	27.9229	26.3364	32.2207
Kiribati	451.5	23.8095	100	100	85.7143	100
Kuwait	18490	0	0	0	0	0
Kyrgyzstan	266364	0	0	0	0	0
Laos	243380	99.5936	100	100	100	99.8852
Latvia	118014	0	0	0	0	0
Lebanon	12190.5	82.1869	83.5979	85.8907	85.8907	86.5961
Lesotho	35195.5	47.4649	52.5351	60.3543	59.9878	55.223
Liberia	97373.5	4.59263	8.85405	12.6076	20.8435	36.5864
Libya	1.82511e+06	0.581936	0.650261	0.829318	0.932983	0.892952
Liechtenstein	236.5	0	0	0	0	0
Lithuania	113821	0	0	0	0	0
Luxembourg	4020.5	0	0	0	0	0
Macedonia	34163.5	1.82505	11.5167	8.93644	15.4814	5.16048
Madagascar	632917	38.525	47.6017	65.7212	67.9122	60.9478
Malawi	122658	98.7555	99.8247	100	100	100
Malaysia	329982	10.3727	28.1926	79.3589	79.3458	85.8661
Mali	1320745	14.8413	15.8213	17.2277	17.6803	16.4789
Malta	387	100	100	100	100	100
Marshall Islands	21.5	0	100	100	100	100
Mauritania	1.11308e+06	0	0	0	0	0
Mauritius	2150	98	98	98	98	100
Mexico	2.14998e+06	15.9112	17.5042	16.5132	18.6462	15.0064
Moldova	49557.5	0	0	0	0	0
Monaco	21.5	100	100	100	100	100
Mongolia	2.2847e+06	0	0	0	0	0
Montenegro	18683.5	20.1381	21.1738	24.0506	23.3602	25.2014
Morocco	773720	14.0134	15.6668	15.1944	13.7327	12.7107
Mozambique	830008	44.0927	61.3211	75.3633	77.6635	82.0545
Myanmar (Burma)	714122	97.474	98.4254	98.6783	98.6904	98.7532
Namibia	896184	0.261497	0.698126	1.65055	2.50702	3.69748
Nauru	21.5	100	100	100	100	100
Nepal	167571	69.1044	69.5022	71.1958	71.4139	71.4396
Netherlands	56244	0.879205	0.879205	0.879205	0.879205	0.879205
New Caledonia	17995.5	99.5221	99.5221	99.5221	99.5221	100
New Zealand	356384	57.5893	53.855	58.4701	60.5393	55.5588
Nicaragua	131988	42.2381	71.0213	89.4934	85.0138	64.4184
Niger	1.2462e+06	2.46364	3.24517	4.99802	8.88498	9.35252
Nigeria	928413	61.8591	84.739	88.4489	88.1108	89.3865
North Korea	160282	0	0.160966	0.134138	0.992622	0.295144
Norway	1021938	0	0	0	0	0
Oman	330218	0.918029	1.13289	1.20451	1.26961	1.42634
Pacific Islands (Palau)	430	30	25	100	100	100
Pakistan	1.01551e+06	6.82997	10.0671	11.8498	11.9429	12.4563
Palestine	7396	68.0233	70.9302	71.5116	70.3488	75.2907
Panama	74196.5	10.8085	15.8795	21.7328	16.517	16.1739
Papua New Guinea	455478	31.1541	42.5915	76.658	75.8508	71.7792
Paracel Islands	21.5	100	100	100	100	100
Paraguay	436063	65.2007	75.1898	81.1212	88.226	90.3954
Peru	1.31935e+06	1.41612	1.44219	7.41302	6.75466	9.1281
Philippines	285133	67.6142	72.5833	69.5219	68.044	66.2026
Poland	506648	0	0	0	0	0
Portugal	117304	97.1041	96.7925	97.4707	97.0125	97.3974
Qatar	12427	0	0	0	0	0
Romania	340345	0.0189514	6.37397	7.6374	7.4163	11.1181
Russia	36054296	0.0454994	0.08432	0.110618	0.11348	0.120971
Rwanda	25305.5	0	6.45709	17.842	51.6568	80.7986
San Marino	64.5	100	100	100	100	100
Sao Tome and Principe	1010.5	80.8511	82.9787	91.4894	91.4894	95.7447
Saudi Arabia	2.15166e+06	0	0	0.00499615	0.0199846	0.0049969
Senegal	203412	43.4309	40.0486	32.3327	38.8331	30.2399
Serbia	123066	6.72607	33.7002	37.631	39.7624	47.2572
Seychelles	258	100	100	100	100	100
Sierra Leone	73358	22.8605	39.4197	44.959	58.2356	61.4009
Singapore	602	82.1429	92.8571	100	100	100
Slovakia	74261	0	0	0	0	0
Slovenia	29605.5	4.86565	4.93827	6.75381	7.40741	8.93246
Solomon Islands	20059.5	29.1533	34.9411	85.9593	91.9614	99.1342
Somalia	644613	3.10186	9.83257	10.3495	6.24708	9.7858
South Africa	1400209	26.223	28.4556	32.5047	30.0034	29.3923
South Georgia and the South Sandwich Is	6213.5	0	0	0	0	0
South Korea	120314	31.9514	41.1008	41.0114	52.1623	47.2535
Spain	657556	46.1777	51.7624	47.3679	47.9139	46.2812
Sri Lanka	67015.5	95.2518	99.3904	99.8396	99.8396	99.8715
St. Kitts and Nevis	193.5	100	100	100	100	100
St. Lucia	709.5	100	100	100	100	100
St. Vincent and the Grenadines	344	100	100	100	100	100
Sudan	2.58385e+06	3.83095	8.05715	5.25633	10.3604	12.9416
Suriname	146136	18.6847	22.8925	70.4723	58.8348	63.4545
Swaziland	19264	100	100	100	100	100
Sweden	972424	0	0	0	0	0
Switzerland	60307.5	0.534759	0.499109	0.998217	1.10517	1.14082
Syria	230050	10.9439	11.3551	11.2056	11.2897	11.2991
Taiwan	39431	95.747	95.8015	95.9106	96.6739	96.452
Tajikistan	181998	7.18252	8.82457	10.5257	9.89959	10.4784
Tanzania, United Republic of	953418	38.9289	72.3937	89.9899	92.7816	96.2408
Thailand	532620	95.0309	95.5718	94.3931	91.3414	78.8722
Togo	58050	59.8148	64.3333	65.5556	75.0741	100
Tonga	322.5	100	100	100	100	100
Trinidad and Tobago	4708.5	0.456621	7.76256	74.8858	66.6667	87.2146
Tunisia	187308	16.9307	19.2952	17.7571	18.595	14.5661
Turkey	1004996	29.1182	33.3176	33.8888	34.9927	33.4096
Turkmenistan	608514	0	0	0	0	0
Uganda	243509	1.73053	3.69062	12.308	13.597	27.5826
Ukraine	909966	0.0850581	0.385124	0.536339	0.548152	0.47735
United Arab Emirates	76733.5	0.0560381	0.0560381	0.0560381	0.0560381	0.0560381
United Kingdom	427914	5.11481	1.86404	0.994825	2.94428	1.54969
United States	1.38022e+07	20.0632	21.322	22.325	21.9657	22.2184
Uruguay	211990	99.9696	99.9696	99.9696	99.9696	100
Uzbekistan	599248	0.333668	1.39567	3.16088	2.26033	2.61553
Vanuatu	4386	90.6863	97.0588	98.5294	98.5294	100
Venezuela	920694	13.9458	9.30808	6.8211	4.89457	6.82052
Vietnam	340044	99.6333	99.9684	99.9494	99.8925	99.5636
Western Samoa	1763	65.8537	93.9024	100	100	100
Yemen	442062	1.92111	4.6204	6.82846	7.28564	8.12822
Zaire	2351197	9.58778	26.0045	50.3914	76.6684	92.8016
Zambia	777827	48.4438	56.4763	68.6716	67.6848	70.2692
Zimbabwe	414154	53.2627	59.539	72.5847	69.9787	75.414
Cell size is 2.5 min resolution (approximately 21.5 sq. km) at equator

## Sheet: Table S5
Table S5. Estimating the cell number in potential suitable habitats predicted using either native points only or introduced points only in model under the current climate (1979-2013)
Name of continent	Total cell count	Prediction with native points	Prediction with introduced points	Overlapping habitats using native and introduced points	Overlapping (%)ª	Native points only	Introduced points only
North America	2127368	169300	196134	140223	6.59138	29077	55911
Asia	3051281	434143	160795	143032	4.6876	291111	17763
Europe	879830	79195	24920	15307	1.73977	63888	9613
Africa	1473170	331248	19571	13933	0.945784	317315	5638
Oceania	419262	143455	83936	60243	14.3688	83212	23693
South America	883195	180440	169086	158683	17.9669	21757	10403
Antarctica	3444160	0	0	0	0	0	0
ª, indicates the proportion of overallping of suitable habtiats predicted using species occurrence points recorded from native regions and introducedd regions
Oceania includes the continental mass of Australia, New Zealnad and other assoctiated Oceanic Islands

## Sheet: Table S6
Table S6. List of different categories of grasslands occurred in different continents of the world under the current and future environment change by 2061-2080.
Continent	Formation	Eco regions name	Division	Current	SSP1-2.6	SSP2-4.5	SSP3-7.0	SSP5-8.5
Asia	Alpine Scrub, Forb Meadow & Grassland	Central Tibetan Plateau alpine steppe	Central Asian Alpine Scrub, Forb Meadow & Grassland
		Eastern Himalayan alpine shrub and meadows	Central Asian Alpine Scrub, Forb Meadow & Grassland		X	X	X	X
		Karakoram-West Tibetan Plateau alpine steppe	Central Asian Alpine Scrub, Forb Meadow & Grassland
		North Tibetan Plateau-Kunlun Mountains alpine desert	Central Asian Alpine Scrub, Forb Meadow & Grassland
		Northwestern Himalayan alpine shrub and meadows	Central Asian Alpine Scrub, Forb Meadow & Grassland
		Qilian Mountains subalpine meadows	Central Asian Alpine Scrub, Forb Meadow & Grassland
		Southeast Tibet shrublands and meadows	Central Asian Alpine Scrub, Forb Meadow & Grassland
		Tian Shan montane steppe and meadows	Central Asian Alpine Scrub, Forb Meadow & Grassland
		Tibetan Plateau alpine shrublands and meadows	Central Asian Alpine Scrub, Forb Meadow & Grassland
		Western Himalayan alpine shrub and Meadows	Central Asian Alpine Scrub, Forb Meadow & Grassland	X	X	X	X	X
		Yarlung Tsangpo arid steppe	Central Asian Alpine Scrub, Forb Meadow & Grassland				X	X
		Sayan Alpine meadows and tundra	Central Asian Alpine Scrub, Forb Meadow & Grassland
		Altai alpine meadow and tundra	Central Asian Alpine Scrub, Forb Meadow & Grassland
		Altai montane forest and forest steppe	Central Asian Alpine Scrub, Forb Meadow & Grassland
	Cool Semi-Desert Scrub & Grassland	Alai-Western Tian Shan steppe	Western Eurasian Cool Semi-Desert Scrub & Grassland		X	X	X	X
		Altai steppe and semi-desert	Eastern Eurasian Cool Semi-Desert Scrub & Grassland
		Eastern Gobi desert steppe	Eastern Eurasian Cool Semi-Desert Scrub & Grassland
		Great Lakes Basin desert steppe	Eastern Eurasian Cool Semi-Desert Scrub & Grassland
		Kazakh semi-desert	Eastern Eurasian Cool Semi-Desert Scrub & Grassland
		Tian Shan foothill arid steppe	Eastern Eurasian Cool Semi-Desert Scrub & Grassland
		Eastern Anatolian montane steppe	Western Eurasian Cool Semi-Desert Scrub & Grassland
		Emin Valley steppe	Eastern Eurasian Cool Semi-Desert Scrub & Grassland
		Kazakh steppe	Eastern Eurasian Cool Semi-Desert Scrub & Grassland
		Kazakh upland	Eastern Eurasian Cool Semi-Desert Scrub & Grassland
		Kopet Dag woodlands and forest steppe	Western Eurasian Cool Semi-Desert Scrub & Grassland
		Ordos Plateau steppe	Eastern Eurasian Cool Semi-Desert Scrub & Grassland
		Pontic steppe	Western Eurasian Cool Semi-Desert Scrub & Grassland
		Sayan Intermontane steppe	Eastern Eurasian Cool Semi-Desert Scrub & Grassland
		Badghyz and Karabil semi-desert	Eastern Eurasian Cool Semi-Desert Scrub & Grassland
		Qaidam Basin semi-desert	Eastern Eurasian Cool Semi-Desert Scrub & Grassland
	Mediterranean Scrub, Grassland & Forb Meadow	Middle East steppe	Mediterranean Basin Dry Grassland
	Temperate Grassland, Meadow & Shrubland	Terai-Duar savanna and grasslands	Eastern Eurasian Grassland & Shrubland	X	X	X	X	X
		Amur meadow steppe	Northeast Asia Grassland & Shrubland
		Daurian forest steppe	Eastern Eurasian Grassland & Shrubland
		East European forest steppe	Western Eurasian Grassland & Shrubland
		Gissaro-Alai open woodlands	Eastern Eurasian Grassland & Shrubland	X	X	X	X	X
		Kazakh forest steppe	Eastern Eurasian Grassland & Shrubland
		Mongolian-Manchurian grassland	Eastern Eurasian Grassland & Shrubland
		Nenjiang River grassland	Eastern Eurasian Grassland & Shrubland
		Selenge-Orkhon forest steppe	Eastern Eurasian Grassland & Shrubland
		South Siberian forest steppe	Eastern Eurasian Grassland & Shrubland
		Suiphun-Khanka meadows and forest meadows	Northeast Asia Grassland & Shrubland
		Central Anatolian steppe	Western Eurasian Grassland & Shrubland
		Bohai Sea saline meadow	Northeast Asia Grassland & Shrubland	X	X	X	X	X
		Yellow Sea saline meadow	Northeast Asia Grassland & Shrubland	X	X	X	X	X
	Tropical Lowland Shrubland, Grassland & Savanna	Trans Fly savanna and grasslands	Australian Tropical Savanna
		Central Range sub-alpine grasslands	New Guinea Montane Meadow
		Kinabalu montane alpine meadows	Indomalayan Montane Meadow
Africa	Mediterranean Scrub, Grassland & Forb Meadow	Mediterranean dry woodlands and steppe	Mediterranean Basin Dry Grassland
		Lowland fynbos and renosterveld	South African Cape Mediterranean Scrub	X	X	X	X	X
	Temperate Grassland, Meadow & Shrubland	Drakensberg alti-montane grasslands and woodlands	Southern African Montane Grassland
		Drakensberg montane grasslands, woodlands and forests	Southern African Montane Grassland	X	X	X	X	X
		Highveld grasslands	Southern African Montane Grassland	X	X	X	X
	Tropical Lowland Shrubland, Grassland & Savanna	Angolan Mopane woodlands	Mopane Savanna	X		X	X	X
		Angolan scarp savanna and woodlands	West-Central African Mesic Woodland and Savanna	X	X	X	X	X
		Sahelian Acacia savanna	North Sahel Semi-Desert Scrub and Grassland	X	X	X	X	X
		Zambezian Baikiaea woodlands	Miombo and Associated Broadleaf Savanna	X	X	X	X	X
		Kalahari xeric savanna	Eastern and Southern African Dry Savanna & Woodland
		Southern Africa bushveld	Mopane Savanna	X	X	X	X
		Zambezian and Mopane woodlands	Mopane Savanna	X	X	X	X	X
		East Sudanian savanna	West-Central African Mesic Woodland and Savanna	X	X	X	X	X
		Victoria Basin forest-savanna mosaic	Eastern and Southern African Dry Savanna & Woodland		X	X	X	X
		West Sudanian savanna	Sudano Sahelian Dry Savanna	X	X	X	X	X
		Western Zambezian grasslands	Miombo and Associated Broadleaf Savanna		X	X	X	X
		Guinean forest-savanna mosaic	West-Central African Mesic Woodland and Savanna	X	X	X	X	X
		Saharan flooded grasslands	West-Central African Mesic Woodland and Savanna					X
		Angolan montane forest-grassland mosaic	African Montane Grassland & Shrubland	X	X	X	X	X
		East African montane moorlands	African Montane Grassland & Shrubland					X
		Ethiopian montane grasslands and woodlands	African Montane Grassland & Shrubland			X	X	X
		Ethiopian montane moorlands	African Montane Grassland & Shrubland			X	X
		Madagascar ericoid thickets	African (Madagascan) Montane Grassland and Shrubland		X			X
		Rwenzori-Virunga montane moorlands	African Montane Grassland & Shrubland
		Southern Rift montane forest-grassland mosaic	African Montane Grassland & Shrubland	X		X	X	X
		Jos Plateau forest-grassland mosaic	African Montane Grassland & Shrubland
		Eastern Zimbabwe montane forest-grassland mosaic	African Montane Grassland & Shrubland
	Warm Semi-Desert Scrub & Grassland	Northern Acacia-Commiphora bushlands and thickets	Eastern Africa Xeric Scrub and Grassland	X	X	X	X	X
		Somali Acacia-Commiphora bushlands and thickets	Eastern Africa Xeric Scrub and Grassland	X	X	X	X	X
		Southern Acacia-Commiphora bushlands and thickets	Eastern Africa Xeric Scrub and Grassland	X	X	X	X	X
		Masai xeric grasslands and shrublands	Eastern Africa Xeric Scrub and Grassland
Australia	Alpine Scrub, Forb Meadow & Grassland	Australian Alps montane grasslands	Australian Alpine Scrub, Forb Meadow& Grassland	X	X	X	X	X
	Mediterranean Scrub, Grassland & Forb Meadow	Coolgardie woodlands	Australian Mediterranean Scrub	X	X	X	X	X
		Esperance mallee	Australian Mediterranean Scrub	X	X	X	X	X
		Southwest Australia savanna	Australian Mediterranean Scrub	X	X	X	X	X
		Eyre and York mallee	Australian Mediterranean Scrub	X	X	X	X	X
		Mount Lofty woodlands	Australian Mediterranean Scrub	X	X	X	X	X
		Murray-Darling woodlands and mallee	Australian Mediterranean Scrub	X	X	X	X	X
		Swan Coastal Plain Scrub and Woodlands	Australian Mediterranean Scrub	X	X	X	X	X
	Temperate Grassland, Meadow & Shrubland	Southeast Australia temperate savanna	Australian Temperate Grassland & Shrubland	X	X	X	X	X
	Tropical Lowland Shrubland, Grassland & Savanna	Arnhem Land tropical savanna	Australian Tropical Savanna	X	X	X	X	X
		Brigalow tropical savanna	Australian Tropical Savanna	X	X	X	X	X
		Cape York Peninsula tropical savanna	Australian Tropical Savanna	X	X	X	X	X
		Carpentaria tropical savanna	Australian Tropical Savanna	X	X	X	X	X
		Einasleigh upland savanna	Australian Tropical Savanna	X	X	X	X	X
		Kimberly tropical savanna	Australian Tropical Savanna	X	X	X	X	X
		Mitchell grass downs	Australian Tropical Savanna	X	X	X	X	X
		Victoria Plains tropical savanna	Australian Tropical Savanna	X	X	X	X	X
	Warm Semi-Desert Scrub & Grassland	Great Sandy-Tanami desert	Australia Warm Semi-Desert Scrub & Grassland	X	X	X	X	X
Europe	Alpine Scrub, Forb Meadow & Grassland	Alps conifer and mixed forests	European Alpine Scrub, Forb Meadow & Grassland
	Boreal Grassland, Meadow & Shrubland	Faroe Islands boreal grasslands	Eurasian Boreal Grassland, Meadow & Shrubland
		Scandinavian Montane Birch forest and grasslands	Eurasian Boreal Grassland, Meadow & Shrubland
	Cool Semi-Desert Scrub & Grassland	Kazakh steppe	Eastern Eurasian Cool Semi-Desert Scrub & Grassland
		Pontic steppe	Western Eurasian Cool Semi-Desert Scrub & Grassland	X	X	X	X	X
	Temperate Grassland, Meadow & Shrubland	East European forest steppe	Western Eurasian Grassland & Shrubland
		Kazakh forest steppe	Eastern Eurasian Grassland & Shrubland
North America	Cool Semi-Desert Scrub & Grassland	Great Basin shrub steppe	Western North American Cool Semi-Desert Scrub & Grassland
		Wyoming Basin shrub steppe	Western North American Cool Semi-Desert Scrub & Grassland
		Montana Valley grasslands	Western North American Cool Semi-Desert Scrub & Grassland
		Snake-Columbia shrub steppe	Western North American Cool Semi-Desert Scrub & Grassland
	Mediterranean Scrub, Grassland & Forb Meadow	California Central Valley grasslands	California Grassland & Meadow	X	X	X	X	X
		California interior chaparral and woodlands	California Grassland & Meadow	X	X	X	X	X
	Temperate Grassland, Meadow & Shrubland	Central and Southern mixed grasslands	Great Plains Grassland & Shrubland	X	X	X	X	X
		Central forest-grasslands transition	Great Plains Grassland & Shrubland	X	X	X	X	X
		Central tall grasslands	Great Plains Grassland & Shrubland	X	X	X	X	X
		Edwards Plateau savanna	Great Plains Grassland & Shrubland	X	X	X	X	X
		Flint Hills tall grasslands	Great Plains Grassland & Shrubland	X	X	X	X	X
		Nebraska Sand Hills mixed grasslands	Great Plains Grassland & Shrubland
		Northern mixed grasslands	Great Plains Grassland & Shrubland
		Northern short grasslands	Great Plains Grassland & Shrubland
		Northern tall grasslands	Great Plains Grassland & Shrubland
		Texas blackland prairies	Great Plains Grassland & Shrubland	X	X	X	X	X
		Western Gulf coastal grasslands	Great Plains Grassland & Shrubland	X	X	X	X	X
		Western short grasslands	Great Plains Grassland & Shrubland
		Palouse grasslands	Great Plains Grassland & Shrubland
		Canadian Aspen forests and parklands	Great Plains Grassland & Shrubland
		Montana Foothill grasslands	Great Plains Grassland & Shrubland
	Warm Semi-Desert Scrub & Grassland	Chihuahuan desert	North American Warm Desert Scrub & Grassland	X	X	X	X	X
South America	Cool Semi-Desert Scrub & Grassland	Low Monte	Patagonian Cool Semi-Desert Scrub & Grassland
		Central Andean dry puna	Tropical Andean Cool Semi-Desert Scrub & Grassland
		Southern Andean steppe	Mediterranean and Southern Andean Cool Semi-Desert Scrub & Grassland
	Mediterranean Scrub, Grassland & Forb Meadow	Espinal	Pampean Grassland & Shrubland (semi-arid Pampa)	X	X	X	X	X
	Temperate Grassland, Meadow & Shrubland	Patagonian steppe	Patagonian Grassland and Shrubland
		Humid Pampas	Pampean Grassland & Shrubland	X	X	X	X	X
		Uruguayan savanna	Pampean Grassland & Shrubland	X	X	X	X	X
	Tropical Freshwater Marsh, Wet Meadow & Shrubland	Humid Chaco	Chaco Freshwater Marsh and Shrubland	X	X	X	X	X
		Guayaquil flooded grasslands	Colombian-Venezuelan Freshwater Marsh, Wet Meadow & Shrubland
		Pantanal	Brazilian-Parana Freshwater Marsh, Wet Meadow & Shrubland	X	X	X	X	X
	Tropical Lowland Shrubland, Grassland & Savanna	Cerrado	Brazilian-Parana Lowland Shrubland, Grassland & Savanna	X	X	X	X	X
		Guianan savanna	Guianan Lowland Shrubland, Grassland & Savanna	X	X	X	X	X
		Llanos	Colombian-Venezuelan Lowland Shrubland, Grassland & Savanna	X	X	X
		Beni savanna	Brazilian-Parana Lowland Shrubland, Grassland & Savanna	X	X	X	X	X
		Rio Negro campinarana	Amazonian Shrubland & Savanna	X		X	X	X
		Central Andean wet puna	Tropical Andean Shrubland & Grassland				X	X
		Campos Rupestres montane savanna	Brazilian-Parana Montane Shrubland and Grassland		X	X	X	X
		Pantepui	Guianan Montane Shrubland and Grassland
		Cordillera Central páramo	Tropical Andean Shrubland & Grassland
		Cordillera de Mérida páramo	Tropical Andean Shrubland & Grassland	X	X	X	X	X
		Northern Andean Páramo	Tropical Andean Shrubland & Grassland			X	X	X
Oceania	Alpine Scrub, Forb Meadow & Grassland	South Island montane grasslands	New Zealand Alpine Scrub, Forb Meadow & Grassland	X	X	X	X	X
	Temperate Grassland, Meadow & Shrubland	Cantebury-Otago tussock grasslands	New Zealand Grassland & Shrubland	X	X	X	X	X
			Total	64	67	72	73	73
X, indicates the habitat presence in such category of grassland and blank indicate no habitats of cogon grass in such grasslands.

## Sheet: Table S7
Table S7. Estimated area of cogon grass habitat in different categories of grassland in African Savanna, Australian Savanna, and South American Savanna
Region	Eco name	Current	SSP1-2.6	SSP2-4.5	SSP3-7.0	SSP5-8.5
African Savanna	Angolan scarp savanna and woodlands	66650	74562	71917.5	74605	74605
African Savanna	Sahelian Acacia savanna	82452.5	148070	114230	131537	238951
African Savanna	Kalahari xeric savanna	537.5	774	623.5	1526.5	1462
African Savanna	Southern Africa bushveld	61382.5	78023.5	60866.5	121819	109628
African Savanna	East Sudanian savanna	238456	366424	278188	487749	652460
African Savanna	Victoria Basin forest-savanna mosaic	537.5	2279	2945.5	10126.5	43021.5
African Savanna	West Sudanian savanna	1010371	1207010	1177125	1.26629e+06	1308705
African Savanna	Masai xeric grasslands and shrublands	0	64.5	43	150.5	1397.5
African Savanna	Guinean forest-savanna mosaic	455456	550464	478676	559924	588326
African Savanna	Jos Plateau forest-grassland mosaic	13459	14125.5	14125.5	14125.5	14125.5
African Savanna	Saharan flooded grasslands	24875.5	42699	6278	3956	59985
	Total area	1954178	2484497	2.20502e+06	2671805	3.09267e+06
Region	Eco name	Current	SSP1-2.6	SSP2-4.5	SSP3-7.0	SSP5-8.5
Australian Savanna	Arnhem Land tropical savanna	151726	154413	153832	153618	131430
Australian Savanna	Brigalow tropical savanna	321038	344796	303537	345720	324586
Australian Savanna	Cape York Peninsula tropical savanna	93181	108296	77959	116208	106640
Australian Savanna	Carpentaria tropical savanna	240520	305300	250432	326069	248497
Australian Savanna	Einasleigh upland savanna	98061.5	118572	96750	129946	124829
Australian Savanna	Kimberly tropical savanna	198080	220096	174021	187093	125517
Australian Savanna	Mitchell grass downs	64693.5	101372	69918	144695	129452
Australian Savanna	Trans Fly savanna and grasslands	27821	27821	27090	27821	22209.5
Australian Savanna	Victoria Plains tropical savanna	98491.5	157552	107113	150780	102964
	Total area	1293612	1.53822e+06	1.26065e+06	1.58195e+06	1.31612e+06
Region	Eco name	Current	SSP1-2.6	SSP2-4.5	SSP3-7.0	SSP5-8.5
South American Savanna	Cerrado	419572	607977	500090	979518	997192
South American Savanna	Guianan savanna	11502.5	14362	11524	15286.5	8492.5
South American Savanna	Llanos	197757	158584	117842	66327.5	3246.5
South American Savanna	Beni savanna	92321	128248	127022	126484	97889.5
South American Savanna	Campos Rupestres montane savanna	21973	24510	24961.5	27047	24875.5
South American Savanna	Rio Negro campinarana	4257	150.5		5826.5	107.5
South American Savanna	Uruguayan savanna	415036	415036	415036	415036	415036
South American Savanna	Pantanal	88988.5	178192	153983	179611	161809
	Total area	1.25141e+06	1527059	1350458	1.81514e+06	1708648
